# Supplementary material for: Effect of coordination anion substitutions on relaxation dynamics of defect dicubane Zn2Dy2 tetranuclear clusters
Source: Royal Society of Chemistry journal article supplement (doi:10.1039/c9dt01074b), 2019-01-01
Supplement: c9dt01074b1.pdf [file c9dt01074b1.pdf]

# Supporting Information for:

## Effect of coordination anion substitutions on relaxation dynamics of defect dicubane $Zn_2Dy_2$ tetranuclear clusters

*Hongshan Ke,<sup>\*,†</sup> Wen Wei,<sup>†</sup> Yongsheng Yang,<sup>†</sup> Jun Zhang<sup>\*,‡</sup>, Yi-Quan Zhang<sup>\*,#</sup>, Gang Xie<sup>†</sup> and Sanping Chen<sup>\*,†</sup>*

<sup>†</sup>Key Laboratory of Synthetic and Natural Functional Molecule Chemistry of Ministry of Education, College of Chemistry and Materials Science, Northwest University, Xi'an 710069, P. R. China. E-mail: [hske@nwu.edu.cn](mailto:hske@nwu.edu.cn); [sanpingchen@126.com](mailto:sanpingchen@126.com)

<sup>‡</sup>School of Materials and Chemical Engineering, Anhui Jianzhu University, Hefei, 230601, P. R. China. E-mail: [zhangjun@ahjzu.edu.cn](mailto:zhangjun@ahjzu.edu.cn)

<sup>#</sup>Jiangsu Key Laboratory for NSLSCS, School of Physical Science and Technology, Nanjing Normal University, Nanjing 210023, P. R. China. E-mail: [zhangyiquan@njnu.edu.cn](mailto:zhangyiquan@njnu.edu.cn).

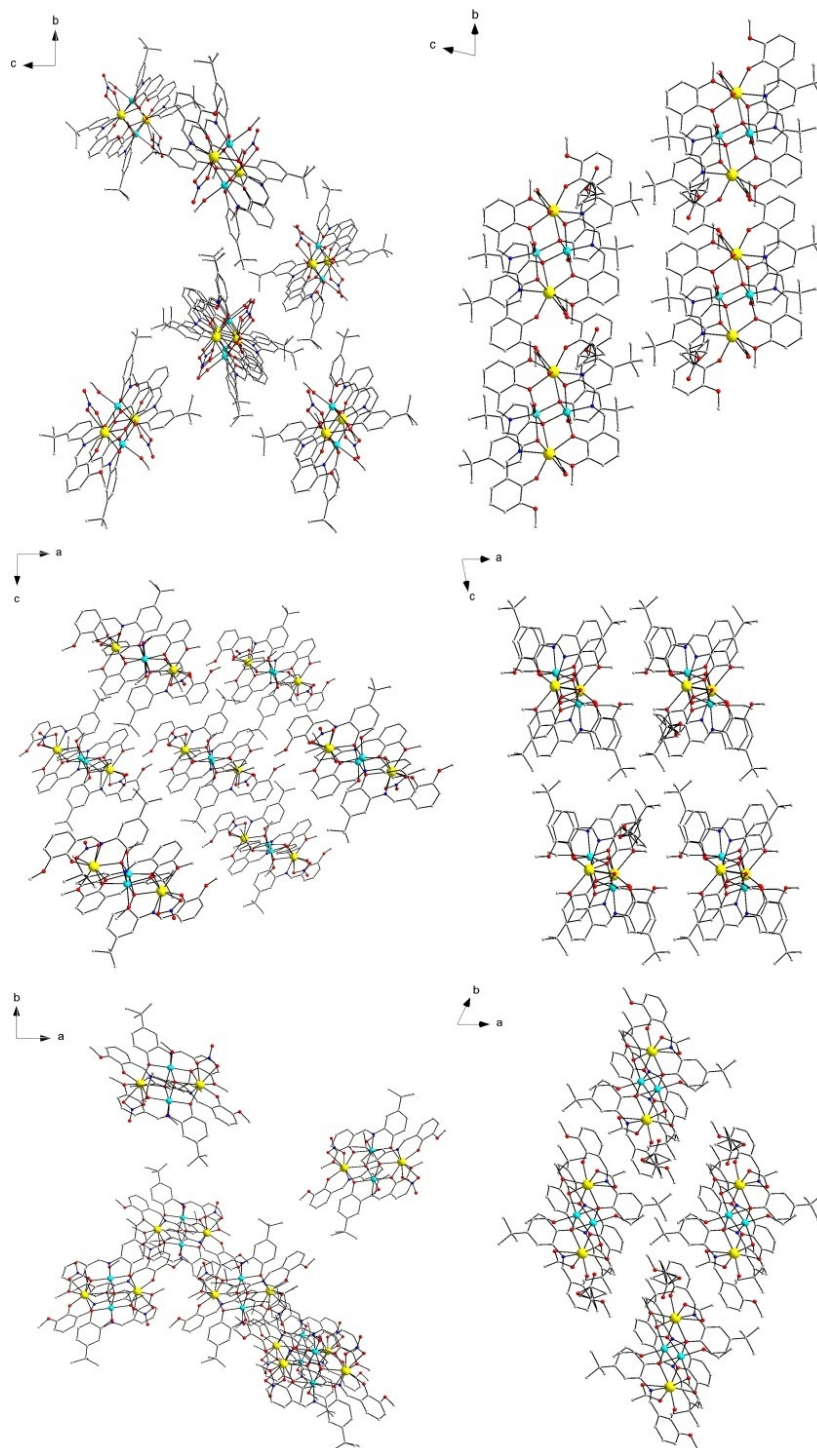

**Fig. S1.** The crystal packing diagrams for **1** (left) and **2** (right) along the a (top), b (middle) and c (bottom) axis, respectively.

**Table S1.** Selected bond lengths (Å) and angles (°) for compounds **1** and **2**

| <b>1</b>           |            | <b>2</b>           |            |
|--------------------|------------|--------------------|------------|
| Bond lengths (Å)   |            |                    |            |
| Zn(1)-N(2)         | 2.069(5)   | Zn(1)-N(2)         | 2.052(6)   |
| Zn(1)-O(3)         | 2.064(4)   | Zn(1)-O(3)         | 2.090(5)   |
| Zn(1)-O(3)#1       | 2.355(4)   | Zn(1)-O(3)#2       | 2.276(5)   |
| Zn(1)-O(5)         | 2.052(3)   | Zn(1)-O(5)         | 2.073(6)   |
| Zn(1)-O(6)         | 2.066(4)   | Zn(1)-O(6)         | 2.062(6)   |
| Zn(1)-O(10)        | 2.177(4)   | Zn(1)-O(9)         | 2.152(5)   |
| Dy(1)-N(1)         | 2.459(4)   | Dy(1)-N(1)         | 2.446(6)   |
| Dy(1)-O(2)         | 2.151(4)   | Dy(1)-O(2)         | 2.158(6)   |
| Dy(1)-O(3)         | 2.377(4)   | Dy(1)-O(3)         | 2.374(5)   |
| Dy(1)-O(4)         | 2.501(4)   | Dy(1)-O(4)         | 2.490(5)   |
| Dy(1)-O(5)         | 2.296(4)   | Dy(1)-O(5)         | 2.285(5)   |
| Dy(1)-O(6)#1       | 2.313(4)   | Dy(1)-O(6)#2       | 2.369(5)   |
| Dy(1)-O(7)         | 2.512(4)   | Dy(1)-O(7)         | 2.431(5)   |
| Dy(1)-O(8)         | 2.478(4)   | Dy(1)-O(8)         | 2.448(5)   |
| Zn(1)-Dy(1)        | 3.4920(8)  | Zn(1)-Dy(1)        | 3.5050(12) |
| Zn(1)#1-Dy(1)      | 3.5198(8)  | Zn(1)#2-Dy(1)      | 3.5215(12) |
| Dy(1)- Dy(1)#1     | 6.1723(8)  | Dy(1)- Dy(1)#2     | 6.2202(16) |
| Bond angles (°)    |            |                    |            |
| Zn(1)-O(3)-Dy(1)   | 103.47(15) | Zn(1)-O(3)-Dy(1)   | 103.3(2)   |
| Zn(1)#1-O(3)-Dy(1) | 96.14(14)  | Zn(1)#2-O(3)-Dy(1) | 98.4(2)    |
| Zn(1)-O(5)-Dy(1)   | 106.73(14) | Zn(1)-O(5)-Dy(1)   | 107.0(2)   |
| Zn(1)-O(6)-Dy(1)#1 | 106.83(16) | Zn(1)-O(6)-Dy(1)#2 | 105.0(2)   |
| Zn(1)-O(3)-Zn(1)#1 | 97.46(16)  | Zn(1)-O(3)-Zn(1)#2 | 96.8(2)    |

Symmetry transformations used to generate equivalent atoms: **1** and **2** #1  
-x, 1-y, -z, #2 2-x, 1-y, 2-z.

**Table S2.** SHAPE<sup>1</sup> analysis of compounds **1** and **2**

| Configuration                                                | ABOXIY, <b>1</b> | ABOXIY, <b>2</b> |
|--------------------------------------------------------------|------------------|------------------|
| Octagon(D <sub>8h</sub> )                                    | 32.666           | 33.346           |
| Heptagonal pyramid(C <sub>7v</sub> )                         | 22.305           | 21.685           |
| Hexagonal bipyramid(D <sub>6h</sub> )                        | 15.200           | 15.684           |
| Cube(O <sub>h</sub> )                                        | 10.383           | 11.496           |
| Square antiprism(D <sub>4d</sub> )                           | 2.971            | 3.286            |
| <b>Triangular dodecahedron(D<sub>2d</sub>)</b>               | <b>2.656</b>     | <b>2.665</b>     |
| Johnson gyrobifastigium J26(D <sub>2d</sub> )                | 13.331           | 13.790           |
| Johnson elongated triangular bipyramid J14(D <sub>3h</sub> ) | 26.913           | 26.274           |
| Biaugmented trigonal prism J50(C <sub>2v</sub> )             | 2.867            | 2.969            |
| <b>Biaugmented trigonal prism(C<sub>2v</sub>)</b>            | <b>2.430</b>     | <b>2.491</b>     |
| Snub diphenoid J84(D <sub>2d</sub> )                         | 4.488            | 4.917            |
| Triakis tetrahedron(T <sub>d</sub> )                         | 11.074           | 12.157           |
| Elongated trigonal bipyramid(D <sub>3h</sub> )               | 23.242           | 23.476           |

**Table S3.** Fitted exchange coupling constant  $J_{\text{exch}}$ , the calculated dipole-dipole interaction  $J_{\text{dip}}$  and the total  $J$  between Dy<sup>III</sup> ions in complexes **1** and **2** (cm<sup>-1</sup>). The intermolecular interactions  $zJ'$  of complexes **1** and **2** were fitted to 0.00 cm<sup>-1</sup>.

|                   | <b>1</b> | <b>2</b> |
|-------------------|----------|----------|
| $J_{\text{exch}}$ | -0.25    | -0.25    |
| $J_{\text{dip}}$  | 0.66     | 0.62     |
| $J$               | 0.41     | 0.37     |

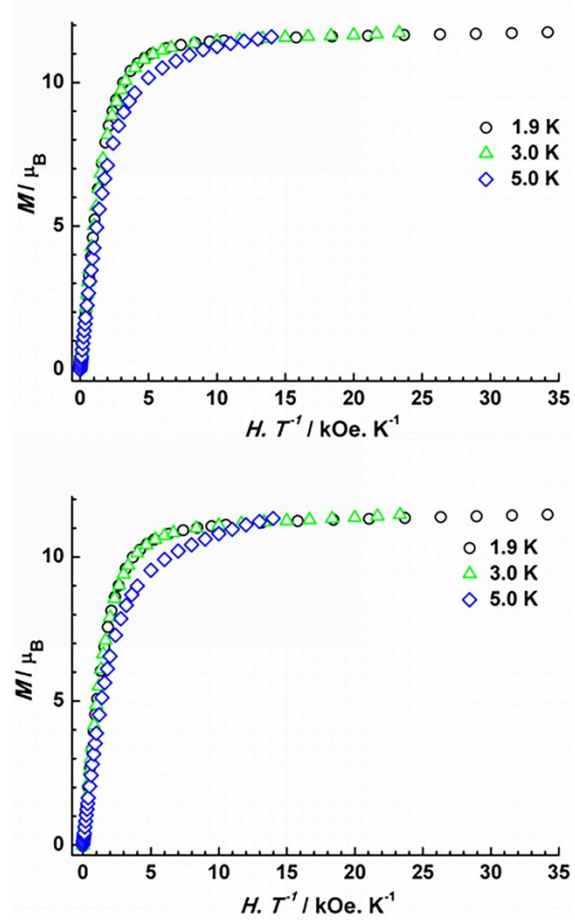

**Fig. S2.** Field dependence of the reduced magnetization for **1** (top) and **2** (bottom) at 1.9, 3 and 5 K.

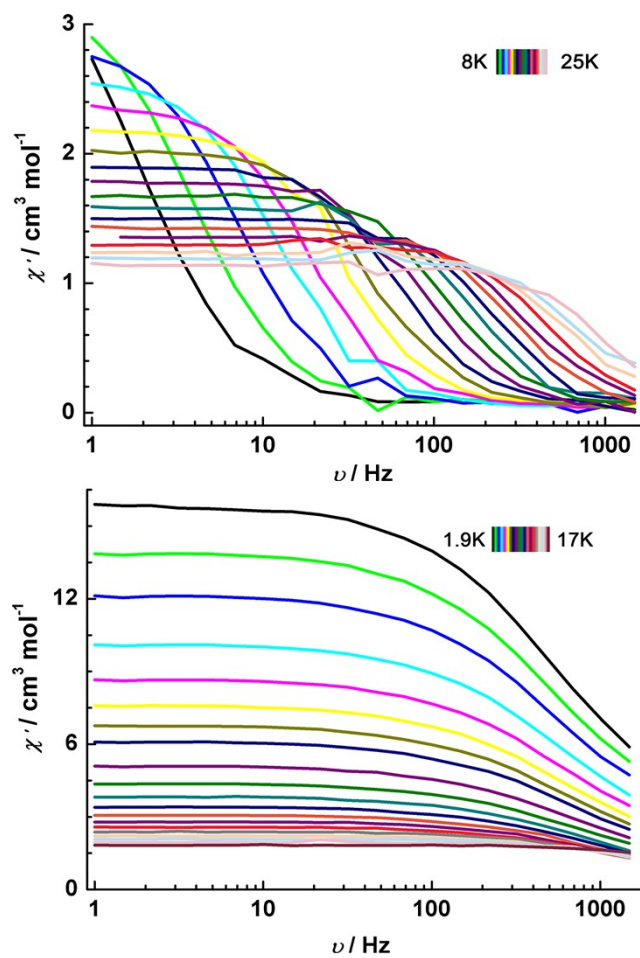

**Fig. S3.** Frequency dependence of in-phase ( $\chi_M'$ ) components of the ac magnetic susceptibility signals for **1**(top) and **2** (bottom) under zero applied dc field and an oscillating field of 3.5 Oe.

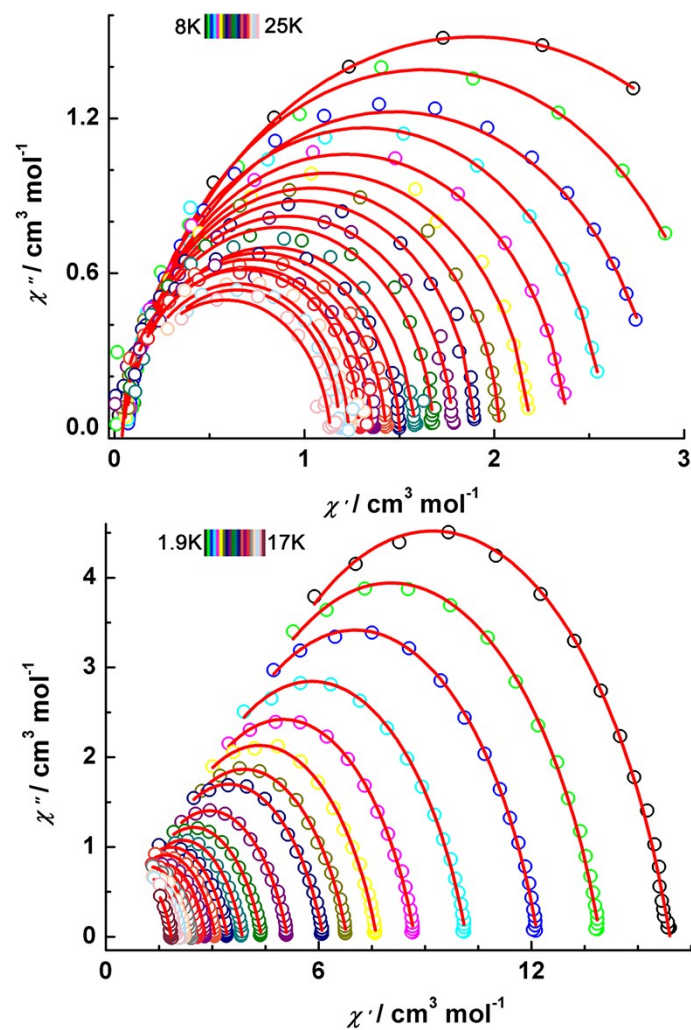

**Fig. S4.** Cole-Cole<sup>2</sup> (Argand) plots for ac susceptibility collected at zero applied dc field for **1** (top) and **2** (bottom). Solid curves represent theoretical calculations on the basis of the generalized Debye model.<sup>3</sup>

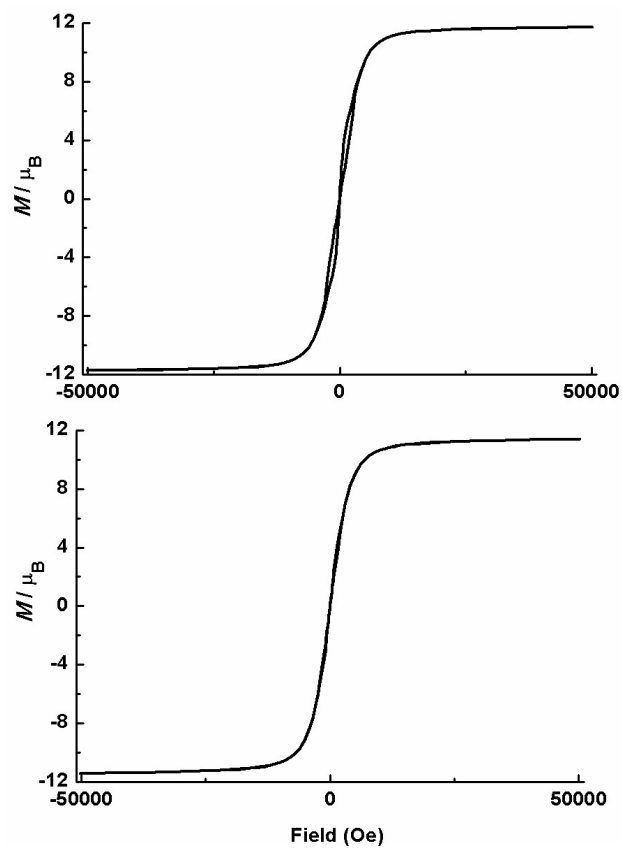

Figure S5. Magnetization versus applied direct-current field scan measured at 1.9 K for **1** (top) and **2** (bottom) while sweeping the field from 5 to -5 T.



**Table S4.**  $\chi_S$ ,  $\chi_T$ ,  $\tau$  and  $\alpha$  values of **1** and **2** estimated by theoretical calculations on the basis of the generalized Debye model<sup>3</sup>

| <b>1</b>                              |            |            |            |           |            |           |            |           |
|---------------------------------------|------------|------------|------------|-----------|------------|-----------|------------|-----------|
| T/K                                   | <b>8</b>   | <b>9</b>   | <b>10</b>  | <b>11</b> | <b>12</b>  | <b>13</b> | <b>14</b>  | <b>15</b> |
| $\chi_S/\text{cm}^3 \text{ mol}^{-1}$ | 0.05       | 0.05       | 0.07       | 0.05      | 0.05       | 0.06      | 0.05       | 0.03      |
| $\chi_T/\text{cm}^3 \text{ mol}^{-1}$ | 3.72       | 3.21       | 2.86       | 2.59      | 2.38       | 2.18      | 2.03       | 1.91      |
| $\alpha$                              | 0.12       | 0.08       | 0.07       | 0.06      | 0.05       | 0.04      | 0.04       | 0.05      |
| $\tau/\text{s}$                       | 0.08248    | 0.04049    | 0.02249    | 0.01278   | 0.00831    | 0.00518   | 0.00361    | 0.00248   |
| T/K                                   | <b>16</b>  | <b>17</b>  | <b>18</b>  | <b>19</b> | <b>20</b>  | <b>21</b> | <b>22</b>  | <b>23</b> |
| $\chi_S/\text{cm}^3 \text{ mol}^{-1}$ | 0.04       | 0.05       | 0.07       | 0.05      | 0.01       | 0.04      | 0.03       | 0.07      |
| $\chi_T/\text{cm}^3 \text{ mol}^{-1}$ | 1.79       | 1.68       | 1.57       | 1.50      | 1.43       | 1.36      | 1.31       | 1.25      |
| $\alpha$                              | 0.04       | 0.03       | 0.02       | 0.03      | 0.06       | 0.04      | 0.03       | 0.02      |
| $\tau/\text{s}$                       | 0.00182    | 0.0013     | 0.00098    | 0.000745  | 0.00056    | 0.00043   | 0.000342   | 0.000273  |
| T/K                                   | <b>24</b>  | <b>25</b>  |            |           |            |           |            |           |
| $\chi_S/\text{cm}^3 \text{ mol}^{-1}$ | 0.08       | 0.11       |            |           |            |           |            |           |
| $\chi_T/\text{cm}^3 \text{ mol}^{-1}$ | 1.20       | 1.14       |            |           |            |           |            |           |
| $\alpha$                              | 0.03       | 0.01       |            |           |            |           |            |           |
| $\tau/\text{s}$                       | 0.00022    | 0.000187   |            |           |            |           |            |           |
| <b>2</b>                              |            |            |            |           |            |           |            |           |
| T/K                                   | <b>1.9</b> | <b>2.2</b> | <b>2.5</b> | <b>3</b>  | <b>3.5</b> | <b>4</b>  | <b>4.5</b> | <b>5</b>  |
| $\chi_S/\text{cm}^3 \text{ mol}^{-1}$ | 2.43       | 2.06       | 1.82       | 1.43      | 1.24       | 1.02      | 1.02       | 0.80      |
| $\chi_T/\text{cm}^3 \text{ mol}^{-1}$ | 15.92      | 13.96      | 12.19      | 10.17     | 8.72       | 7.64      | 6.79       | 6.13      |
| $\alpha$                              | 0.25       | 0.26       | 0.26       | 0.26      | 0.27       | 0.27      | 0.27       | 0.28      |
| $\tau/\text{s}$                       | 0.000294   | 0.000285   | 0.000278   | 0.000264  | 0.000255   | 0.000246  | 0.000251   | 0.000232  |
| T/K                                   | <b>6</b>   | <b>7</b>   | <b>8</b>   | <b>9</b>  | <b>10</b>  | <b>11</b> | <b>12</b>  | <b>13</b> |
| $\chi_S/\text{cm}^3 \text{ mol}^{-1}$ | 0.72       | 0.52       | 0.54       | 0.24      | 0.26       | 0.43      | 0.20       | 0.12      |
| $\chi_T/\text{cm}^3 \text{ mol}^{-1}$ | 5.12       | 4.40       | 3.85       | 3.43      | 3.09       | 2.81      | 2.59       | 2.39      |
| $\alpha$                              | 0.28       | 0.29       | 0.26       | 0.29      | 0.27       | 0.24      | 0.26       | 0.24      |
| $\tau/\text{s}$                       | 0.000254   | 0.000201   | 0.000208   | 0.000162  | 0.000157   | 0.000161  | 0.000124   | 0.000097  |
|                                       |            |            |            |           |            |           |            | 1         |
| T/K                                   | <b>14</b>  | <b>15</b>  | <b>16</b>  | <b>17</b> |            |           |            |           |
| $\chi_S/\text{cm}^3 \text{ mol}^{-1}$ | 0.30       | 0.40       | 0.14       | 0.44      |            |           |            |           |
| $\chi_T/\text{cm}^3 \text{ mol}^{-1}$ | 2.22       | 2.08       | 1.96       | 1.83      |            |           |            |           |
| $\alpha$                              | 0.21       | 0.17       | 0.20       | 0.13      |            |           |            |           |
| $\tau/\text{s}$                       | 0.000094   | 0.000085   | 0.000045   | 0.000043  |            |           |            |           |
|                                       | 4          | 5          | 1          | 8         |            |           |            |           |

**Table S5.**  $\chi_S$ ,  $\chi_T$ , and  $\alpha$  parameters of **1** and **2** derived from Cole-Cole fitting<sup>2</sup>

| <b>1</b>                              |        |        |        |        |        |        |        |        |
|---------------------------------------|--------|--------|--------|--------|--------|--------|--------|--------|
| T/K                                   | 8      | 9      | 10     | 11     | 12     | 13     | 14     | 15     |
| $\chi_T/\text{cm}^3 \text{ mol}^{-1}$ | 3.728  | 3.188  | 2.88   | 2.579  | 2.383  | 2.187  | 2.027  | 1.897  |
| $\chi_S/\text{cm}^3 \text{ mol}^{-1}$ | 0.057  | 0.0748 | 0.0683 | 0.06   | 0.053  | 0.0512 | 0.052  | 0.0638 |
| $\alpha$                              | 0.121  | 0.072  | 0.0866 | 0.0502 | 0.0594 | 0.0493 | 0.0381 | 0.025  |
| T/K                                   | 16     | 17     | 18     | 19     | 20     | 21     | 22     | 23     |
| $\chi_T/\text{cm}^3 \text{ mol}^{-1}$ | 1.782  | 1.677  | 1.581  | 1.500  | 1.428  | 1.360  | 1.295  | 1.222  |
| $\chi_S/\text{cm}^3 \text{ mol}^{-1}$ | 0.0405 | 0.0542 | 0.0621 | 0.0393 | 0.0137 | 0.0188 | 0.041  | 0.2    |
| $\alpha$                              | 0.0388 | 0.0263 | 0.0511 | 0.042  | 0.0498 | 0.060  | 0.023  | 0.01   |
| T/K                                   | 24     | 25     |        |        |        |        |        |        |
| $\chi_T/\text{cm}^3 \text{ mol}^{-1}$ | 1.184  | 1.131  |        |        |        |        |        |        |
| $\chi_S/\text{cm}^3 \text{ mol}^{-1}$ | 0.102  | 0.053  |        |        |        |        |        |        |
| $\alpha$                              | 0.0068 | 0.052  |        |        |        |        |        |        |
| <b>2</b>                              |        |        |        |        |        |        |        |        |
| T/K                                   | 1.9    | 2.2    | 2.5    | 3      | 3.5    | 4      | 4.5    | 5      |
| $\chi_T/\text{cm}^3 \text{ mol}^{-1}$ | 15.901 | 13.938 | 12.178 | 10.160 | 8.706  | 7.632  | 6.793  | 6.128  |
| $\chi_S/\text{cm}^3 \text{ mol}^{-1}$ | 2.520  | 2.131  | 1.871  | 1.450  | 1.292  | 1.023  | 1.017  | 0.798  |
| $\alpha$                              | 0.243  | 0.250  | 0.255  | 0.263  | 0.263  | 0.271  | 0.270  | 0.277  |
| T/K                                   | 6      | 7      | 8      | 9      | 10     | 11     | 12     | 13     |
| $\chi_T/\text{cm}^3 \text{ mol}^{-1}$ | 5.117  | 4.389  | 3.847  | 3.423  | 3.083  | 2.807  | 2.585  | 2.392  |
| $\chi_S/\text{cm}^3 \text{ mol}^{-1}$ | 0.736  | 0.571  | 0.510  | 0.259  | 0.292  | 0.449  | 0.228  | 0.0752 |
| $\alpha$                              | 0.274  | 0.276  | 0.272  | 0.284  | 0.264  | 0.234  | 0.250  | 0.245  |
| T/K                                   | 14     | 15     | 16     | 17     |        |        |        |        |
| $\chi_T/\text{cm}^3 \text{ mol}^{-1}$ | 2.213  | 2.079  | 1.954  | 1.839  |        |        |        |        |
| $\chi_S/\text{cm}^3 \text{ mol}^{-1}$ | 0.476  | 0.277  | 0.234  | 0.201  |        |        |        |        |
| $\alpha$                              | 0.171  | 0.199  | 0.228  | 0.214  |        |        |        |        |

**Table S6.** Calculated energy levels ( $\text{cm}^{-1}$ ),  $\mathbf{g}$  ( $g_x, g_y, g_z$ ) tensors and  $m_J$  values of the lowest eight Kramers doublets (KDs) of individual  $\text{Dy}^{\text{III}}$  fragments of **1** and **2**

| KDs | <b>1</b>           |              |            | <b>2</b>           |              |            |
|-----|--------------------|--------------|------------|--------------------|--------------|------------|
|     | $E/\text{cm}^{-1}$ | $\mathbf{g}$ | $m_J$      | $E/\text{cm}^{-1}$ | $\mathbf{g}$ | $m_J$      |
| 1   | 0.0                | 0.005        | $\pm 15/2$ | 0.0                | 0.015        | $\pm 15/2$ |
|     |                    | 0.006        |            |                    | 0.021        |            |
|     |                    | 19.676       |            |                    | 19.616       |            |
| 2   | 220.3              | 0.124        | $\pm 13/2$ | 184.0              | 0.132        | $\pm 13/2$ |
|     |                    | 0.179        |            |                    | 0.261        |            |
|     |                    | 16.825       |            |                    | 16.516       |            |
| 3   | 367.5              | 2.323        | $\pm 9/2$  | 267.3              | 1.345        | $\pm 3/2$  |
|     |                    | 3.925        |            |                    | 1.873        |            |
|     |                    | 14.541       |            |                    | 17.550       |            |
| 4   | 427.0              | 8.356        | $\pm 11/2$ | 333.6              | 2.003        | $\pm 11/2$ |
|     |                    | 5.495        |            |                    | 4.358        |            |
|     |                    | 1.243        |            |                    | 10.496       |            |
| 5   | 505.0              | 1.260        | $\pm 5/2$  | 373.4              | 0.618        | $\pm 7/2$  |
|     |                    | 3.309        |            |                    | 4.698        |            |
|     |                    | 16.382       |            |                    | 12.331       |            |
| 6   | 538.1              | 2.536        | $\pm 3/2$  | 438.9              | 3.328        | $\pm 5/2$  |
|     |                    | 4.762        |            |                    | 5.384        |            |
|     |                    | 10.570       |            |                    | 11.556       |            |
| 7   | 617.3              | 0.594        | $\pm 1/2$  | 503.1              | 0.409        | $\pm 1/2$  |
|     |                    | 1.015        |            |                    | 0.582        |            |
|     |                    | 16.228       |            |                    | 16.749       |            |
| 8   | 682.3              | 0.115        | $\pm 7/2$  | 601.7              | 0.029        | $\pm 9/2$  |
|     |                    | 0.167        |            |                    | 0.055        |            |
|     |                    | 18.945       |            |                    | 19.171       |            |

**Table S7.** Wave functions with definite projection of the total moment  $|m_J\rangle$  for the lowest two Kramers doublets (KDs) of individual  $\text{Dy}^{\text{III}}$  fragments for **1** and **2**

|          | $E/\text{cm}^{-1}$ | wave functions                                                     |
|----------|--------------------|--------------------------------------------------------------------|
| <b>1</b> | 0.0                | 97% $ \pm 15/2\rangle$                                             |
|          | 220.3              | 91% $ \pm 13/2\rangle$ +4% $ \pm 9/2\rangle$                       |
| <b>2</b> | 0.0                | 96% $ \pm 15/2\rangle$                                             |
|          | 184.0              | 89% $ \pm 13/2\rangle$ +4% $ \pm 9/2\rangle$ +3% $ \pm 7/2\rangle$ |

**Table S8.** Exchange energies ( $\text{cm}^{-1}$ ) and main values of the  $g_z$  for the lowest two exchange doublets of complexes **1** and **2**

|   | <b>1</b>           |        | <b>2</b>           |        |
|---|--------------------|--------|--------------------|--------|
|   | $E/\text{cm}^{-1}$ | $g_z$  | $E/\text{cm}^{-1}$ | $g_z$  |
| 1 | 0.0                | 39.353 | 0.0                | 39.233 |
| 2 | 0.2                | 0.000  | 0.2                | 0.000  |

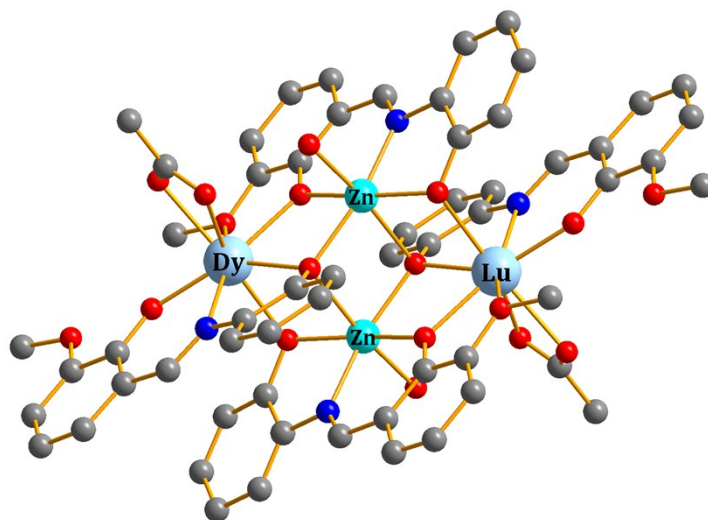

**Fig. S6.** Calculated model structure of individual  $\text{Dy}^{\text{III}}$  fragment of **2**; H atoms are omitted.

### References

- 1 D. Casanova, M. Llunell, P. Alemany and S. Alvarez, *Chem. -Eur. J.*, 2005, **11**, 1479.
- 2 K. S. Cole and R. H. Cole, *J. Chem. Phys.*, 1941, **9**, 341.
- 3 S. M. J. Aubin, Z. Sun, L. Pardi, J. Krzystek, K. Folting, L.-C. Brunel, A. L. Rheingold, G. Christou and D. N. Hendrickson, *Inorg. Chem.*, 1999, **38**, 5329.
